# Supplementary material
Source: PubMed Central journal article supplement (PMC8254762)
Supplement: NIHMS1688762-supplement-1.pdf [file NIHMS1688762-supplement-1.pdf]

# Supplemental Figure 1

## A

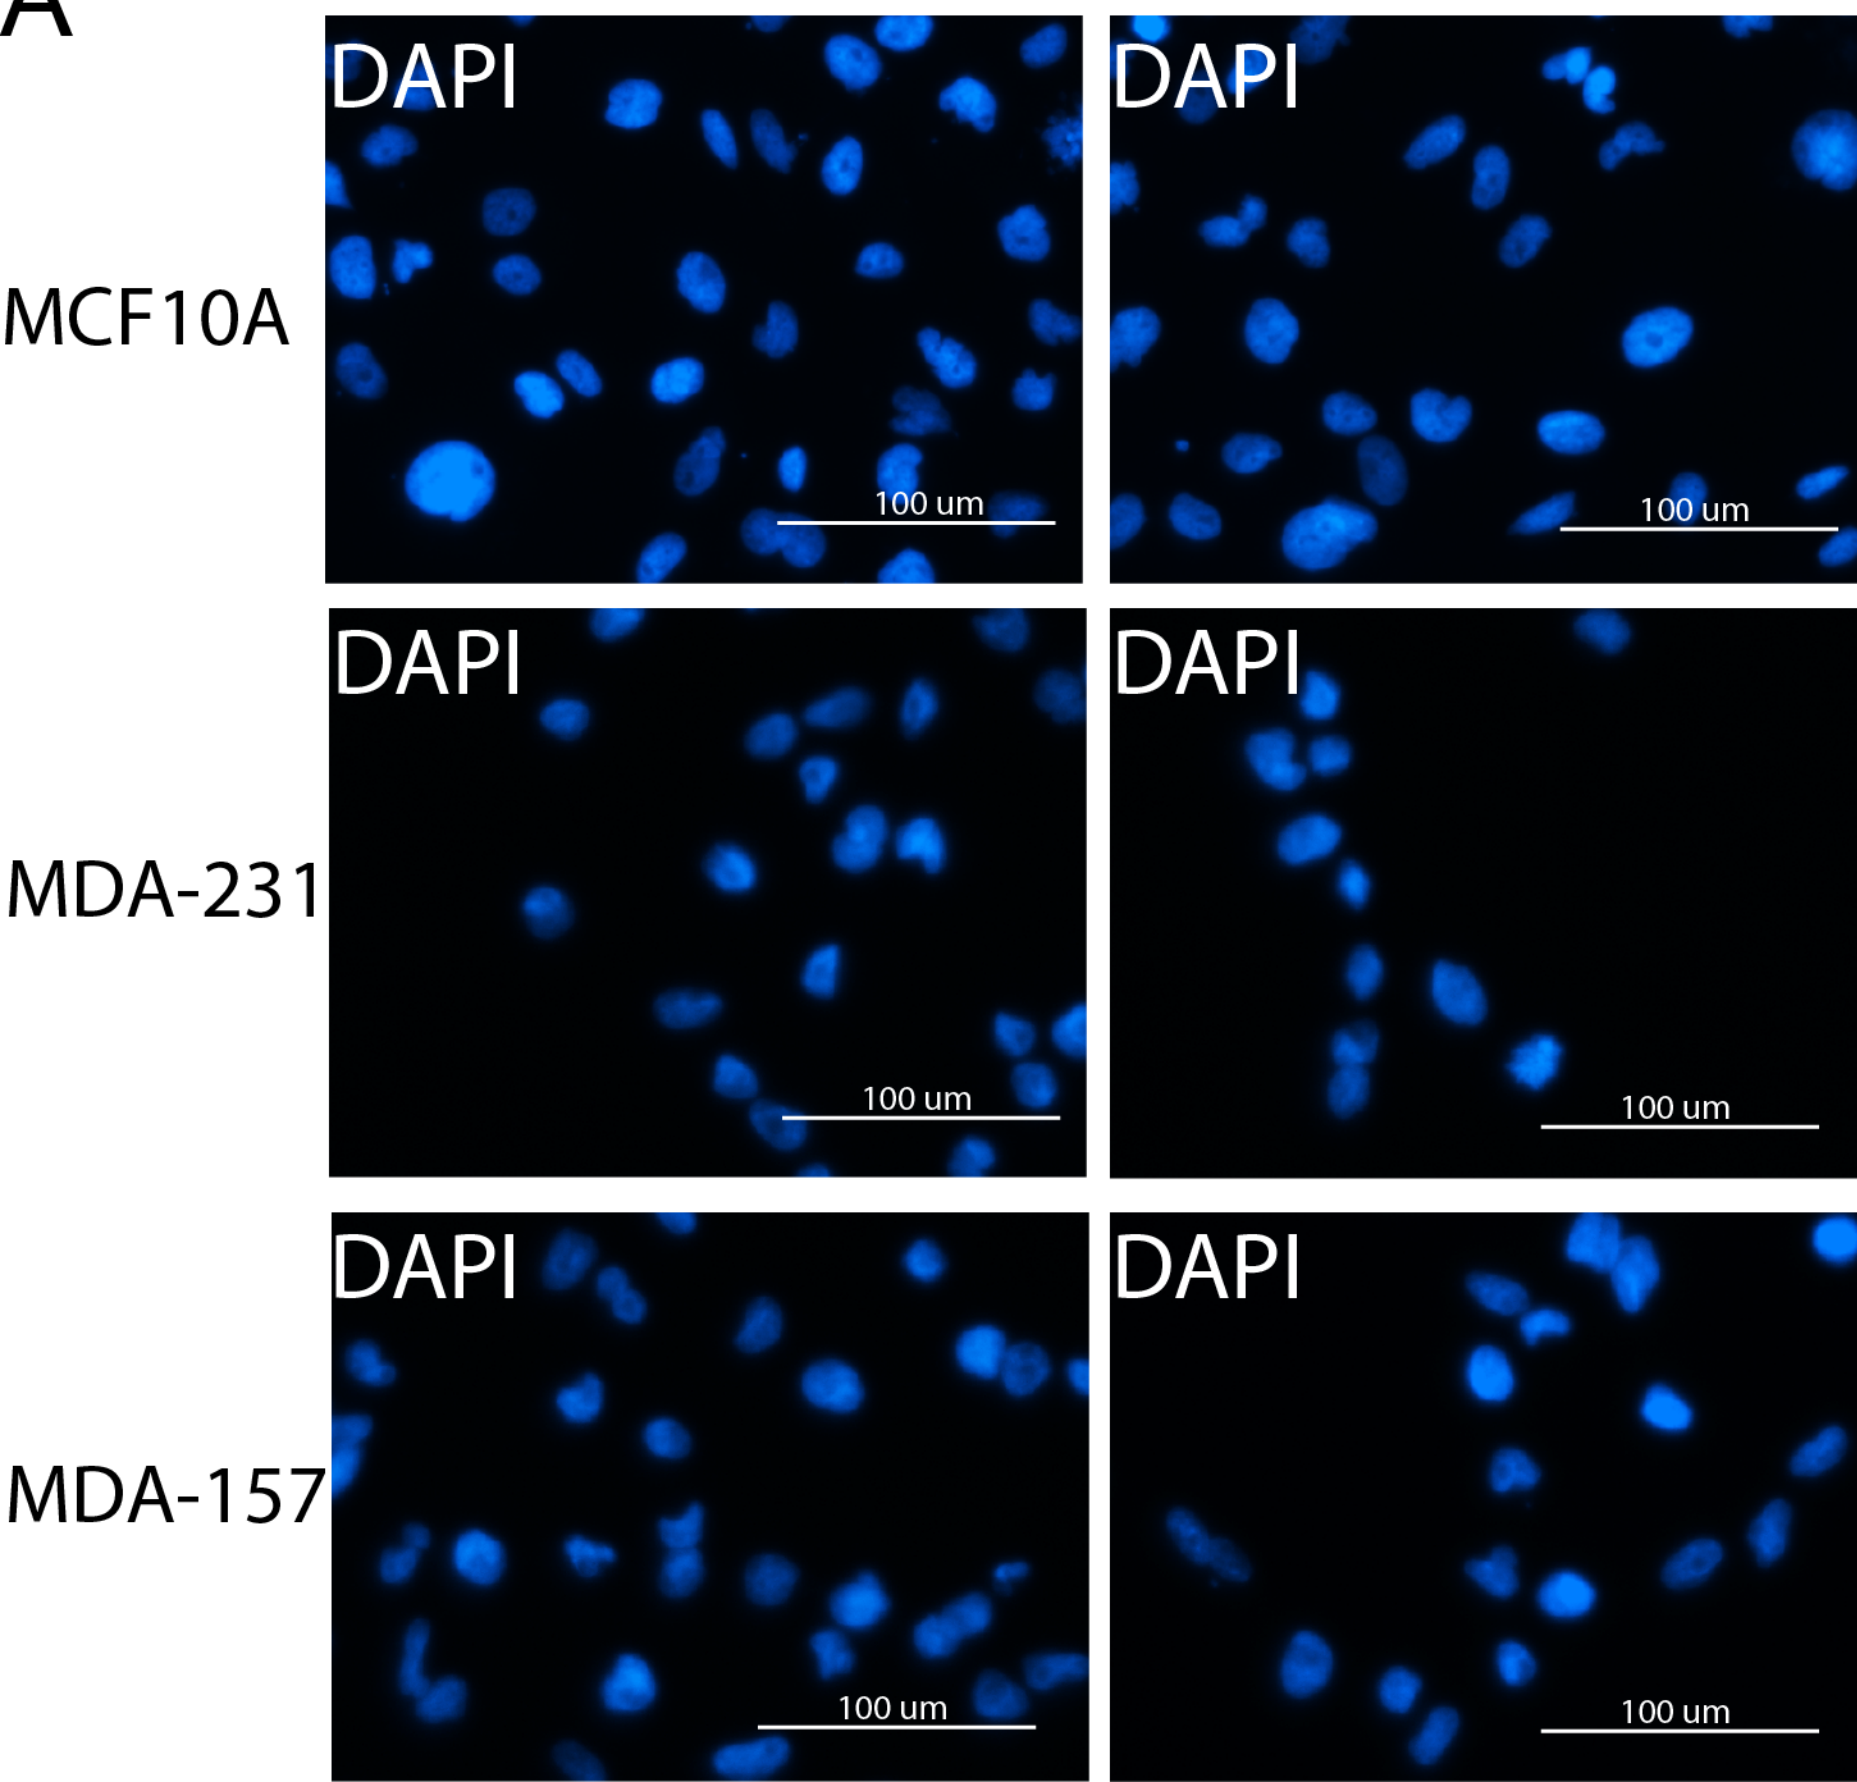

## B

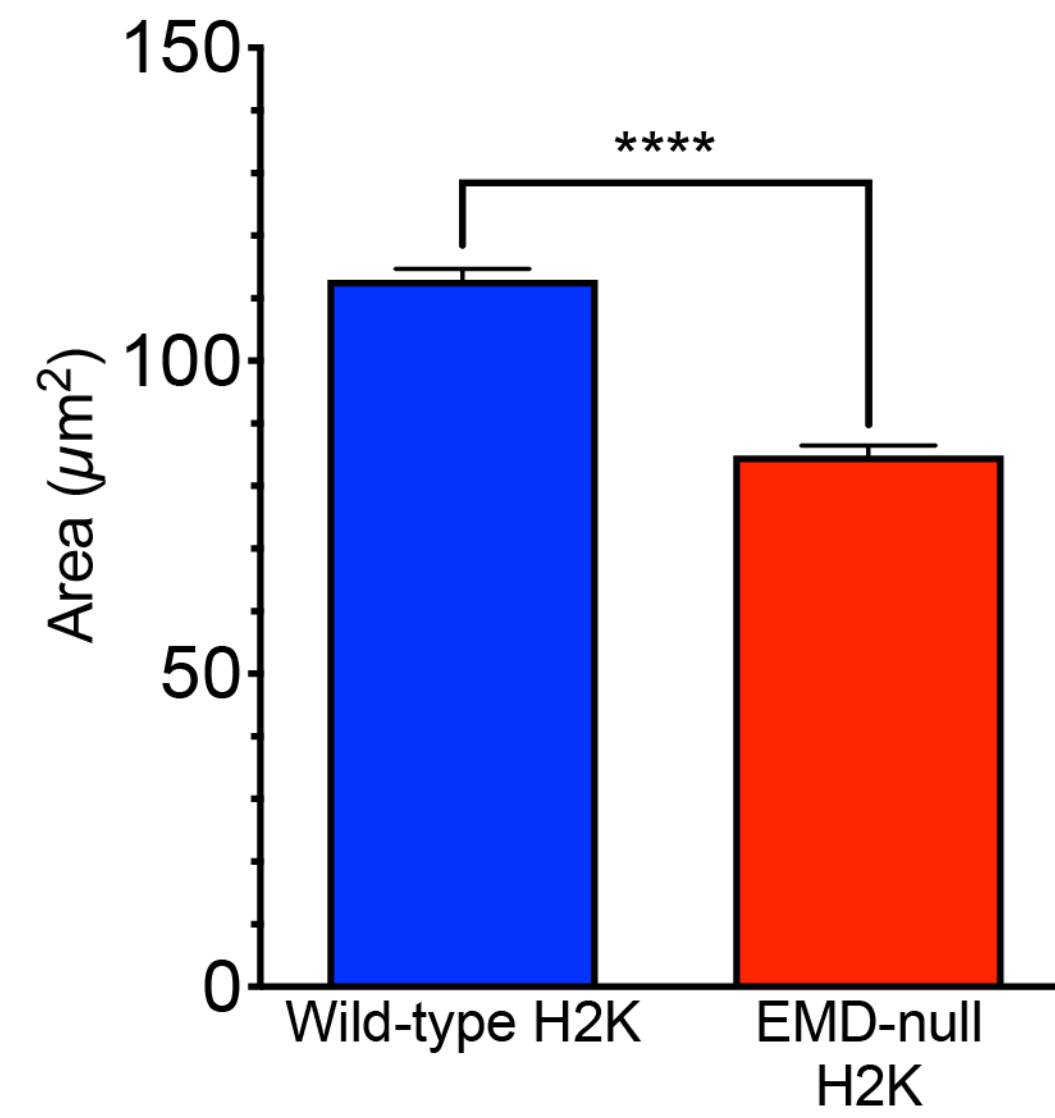

## C

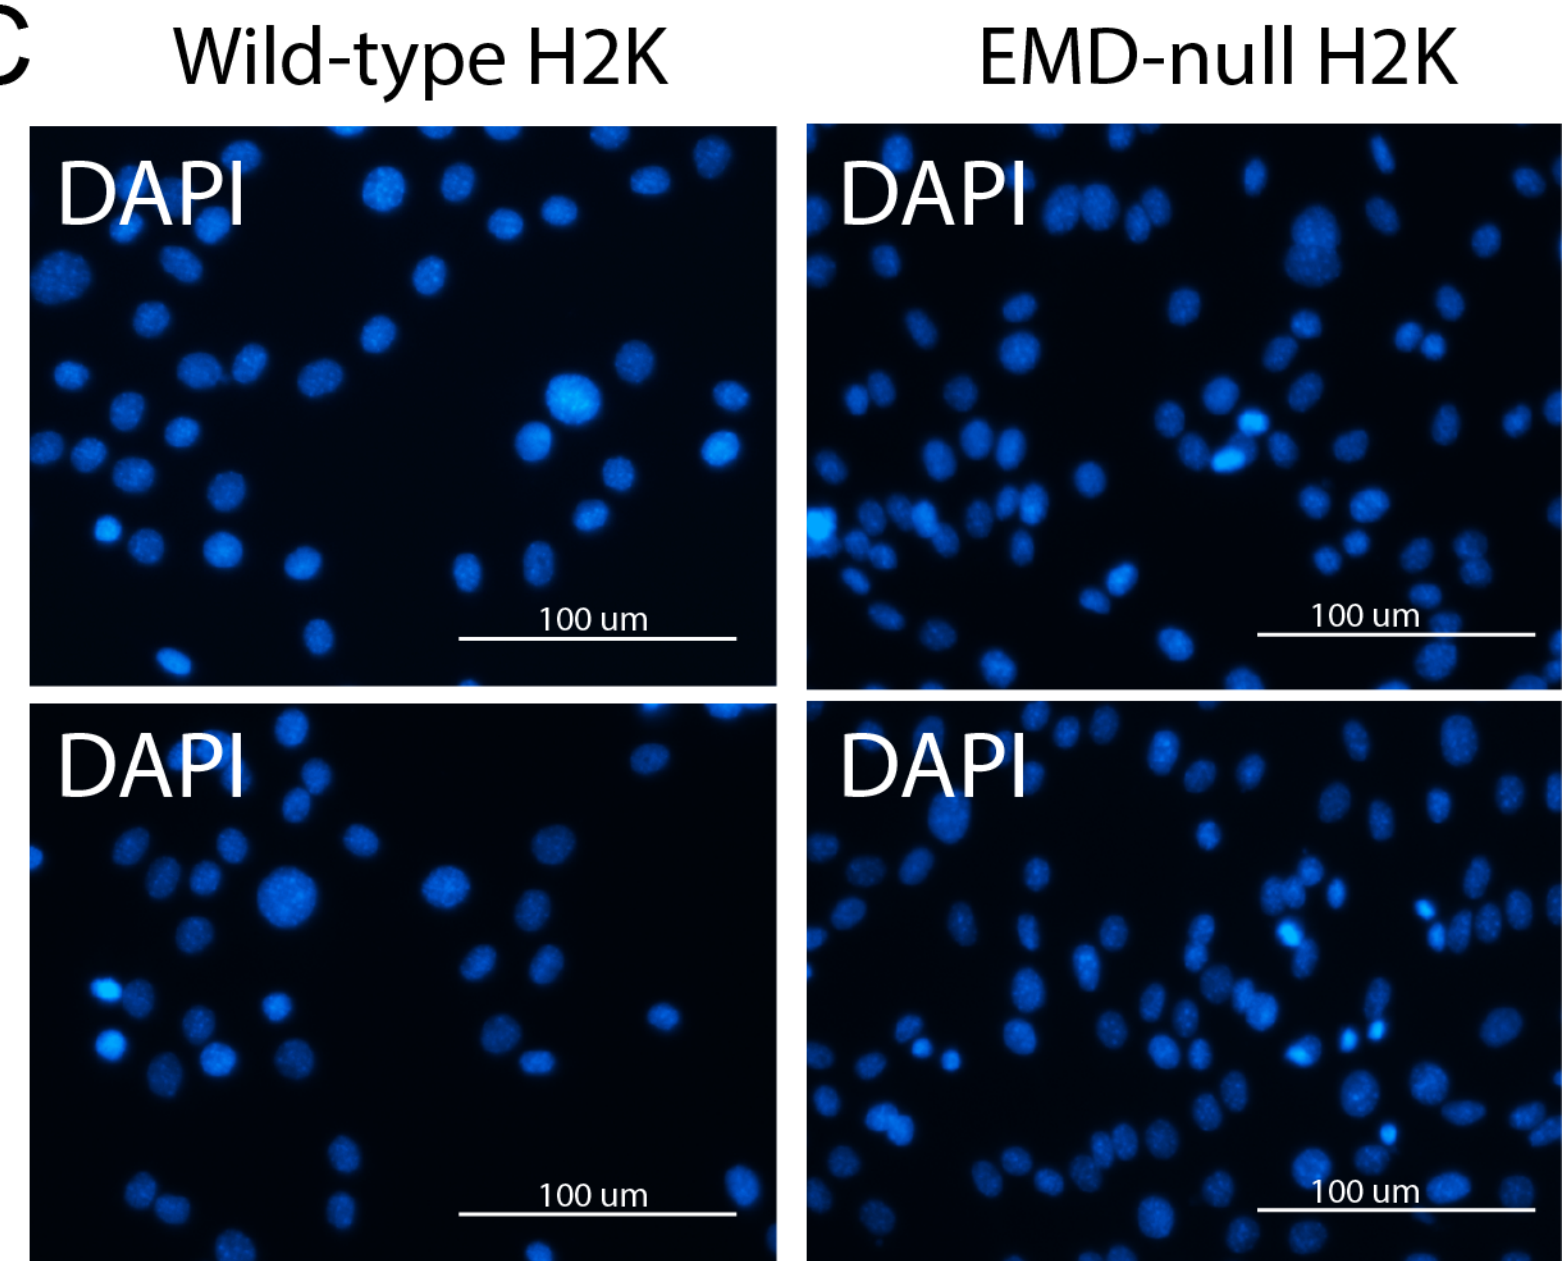

# Supplemental Figure 2

## A

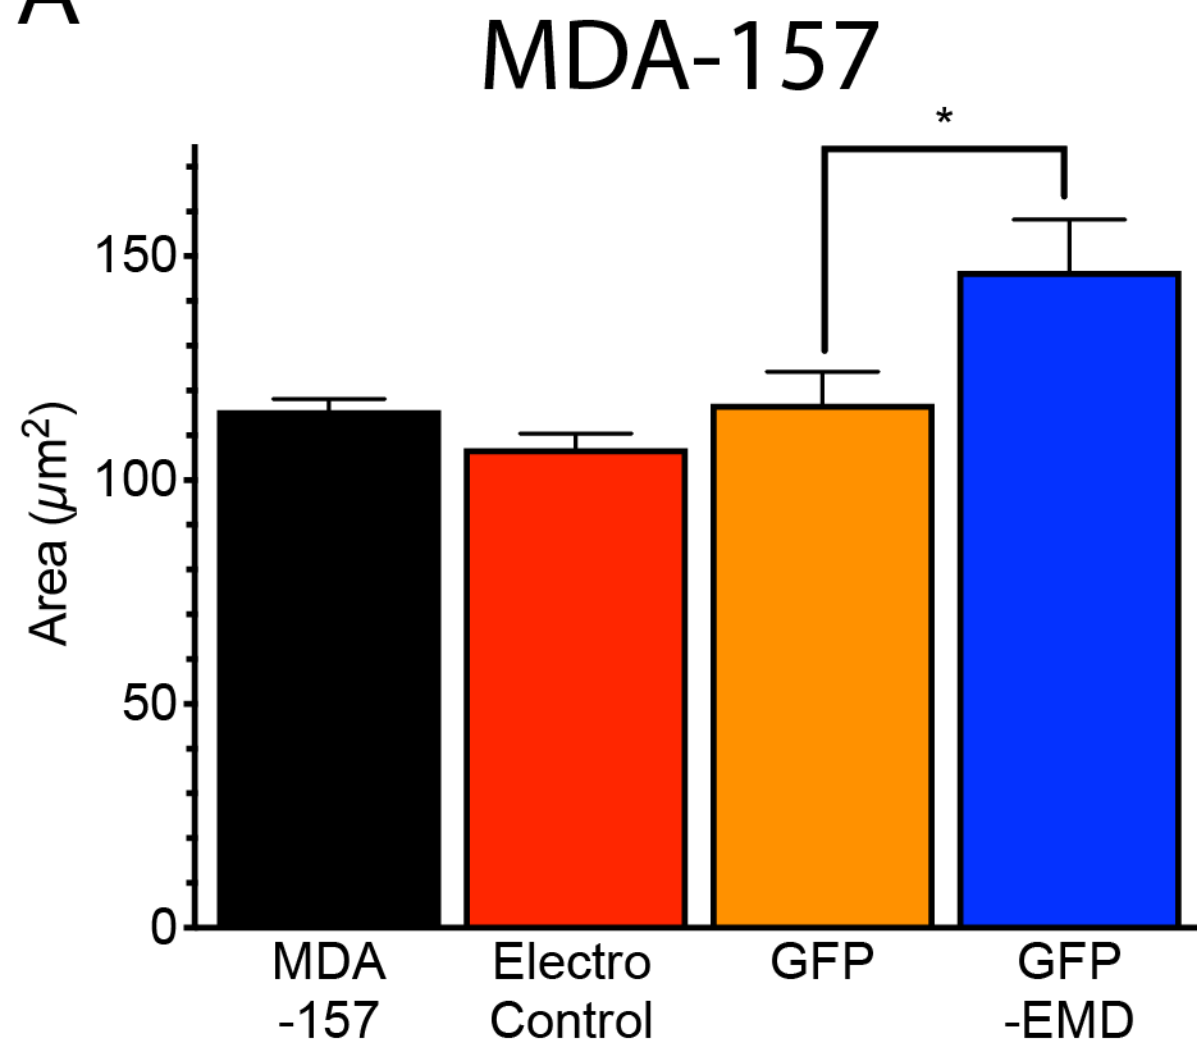

## B

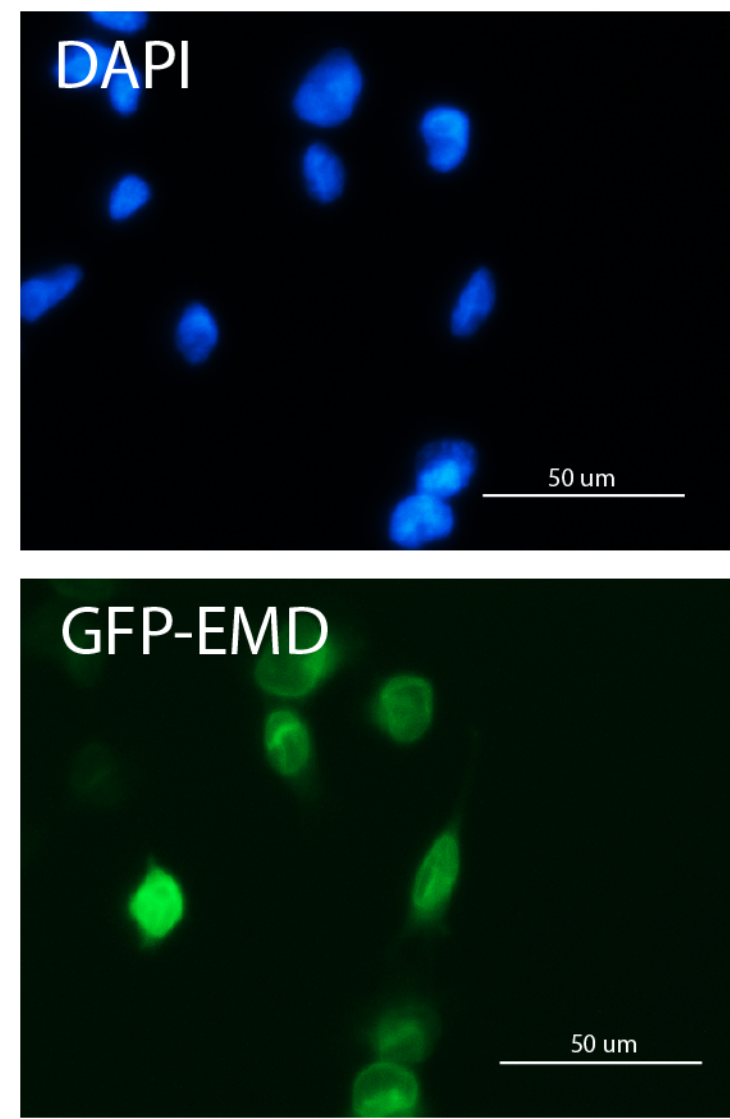

## C

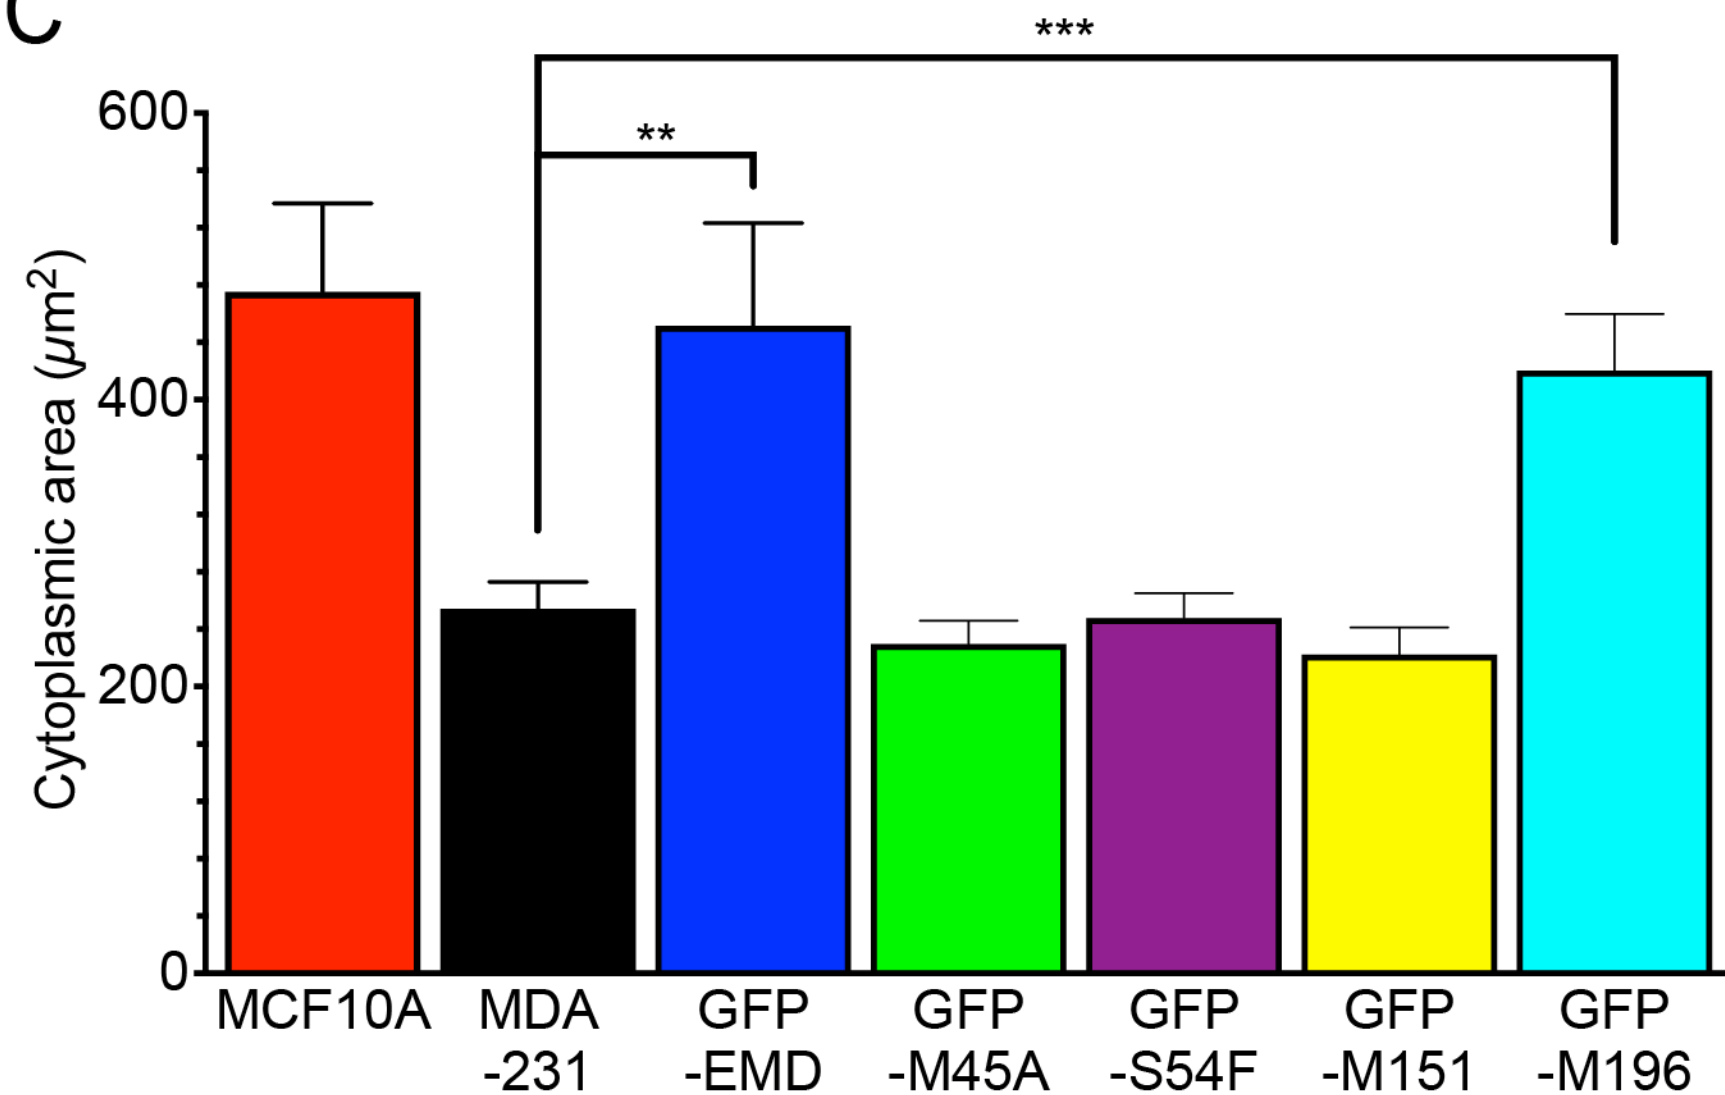



# Supplemental Figure 3

## A

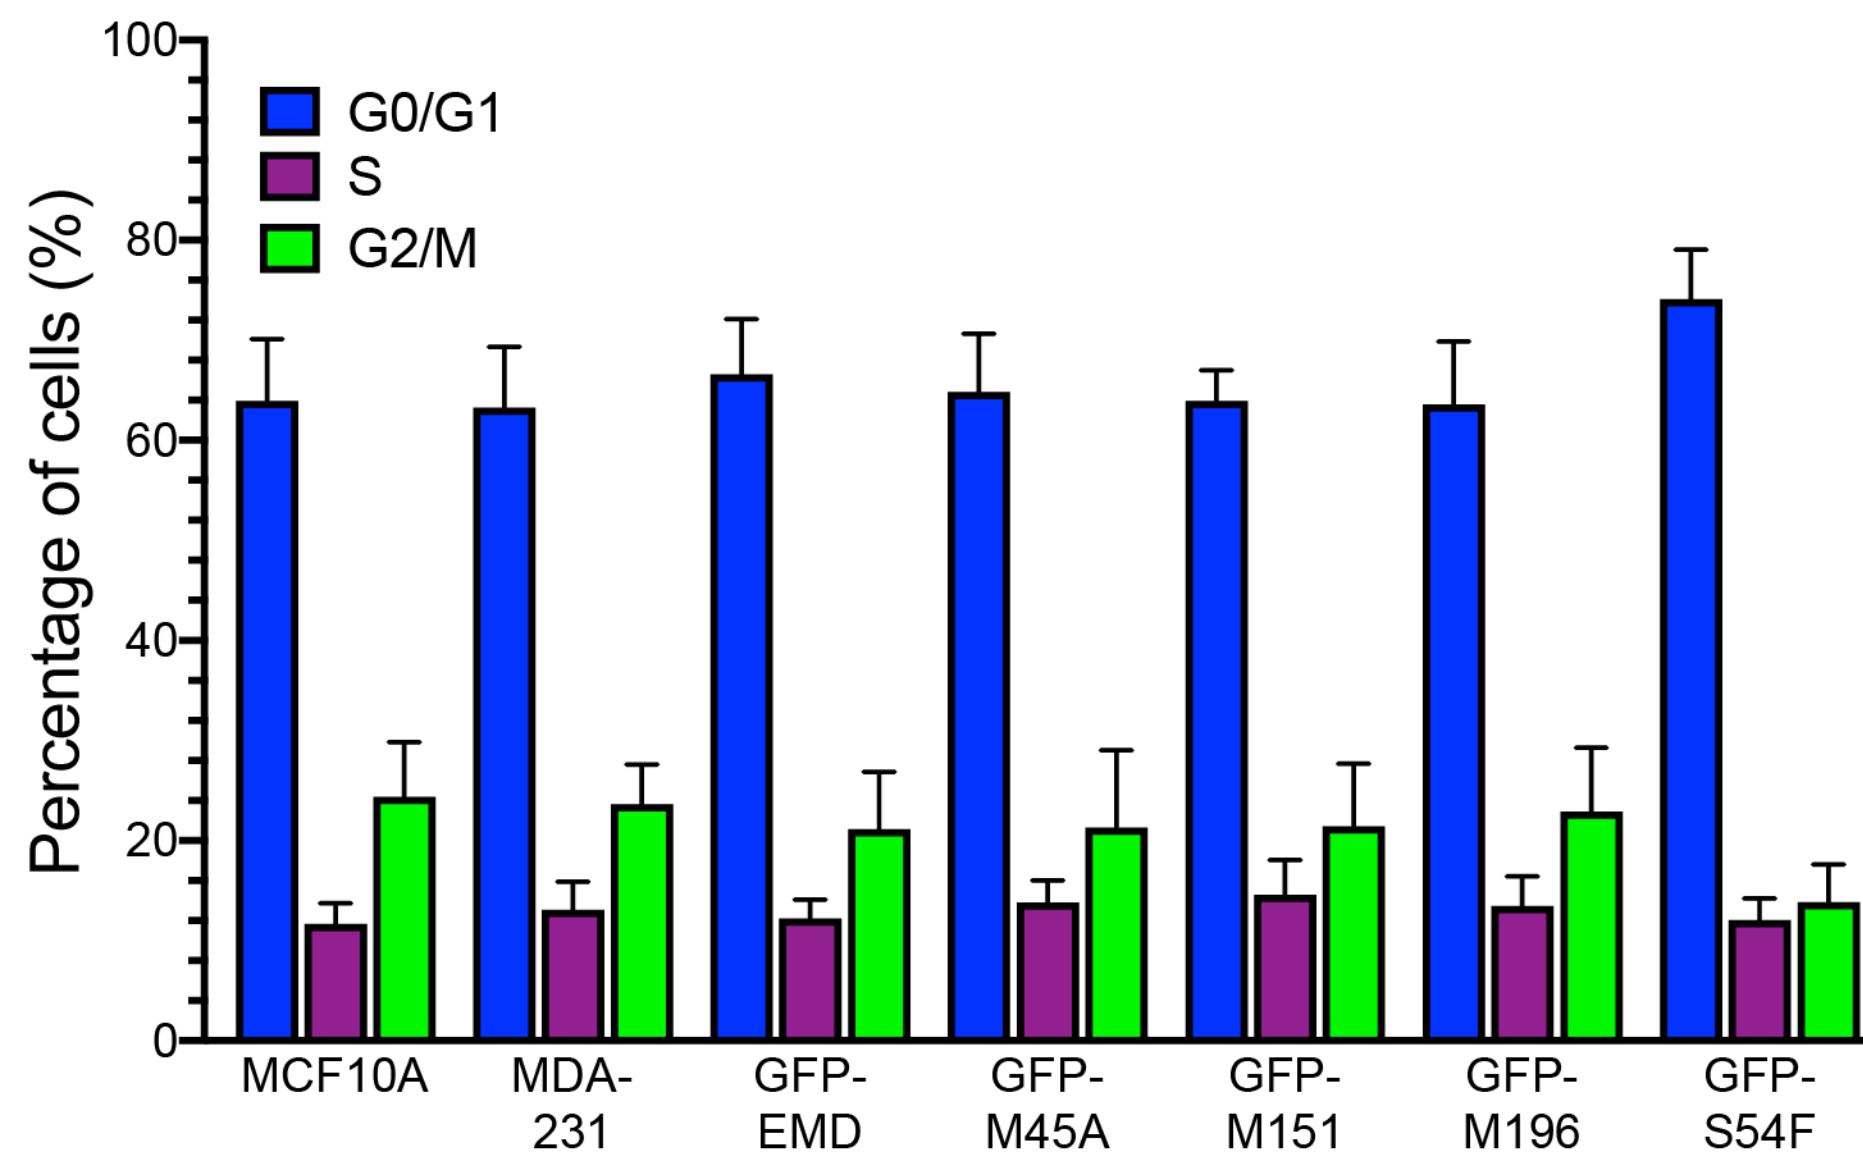

## B

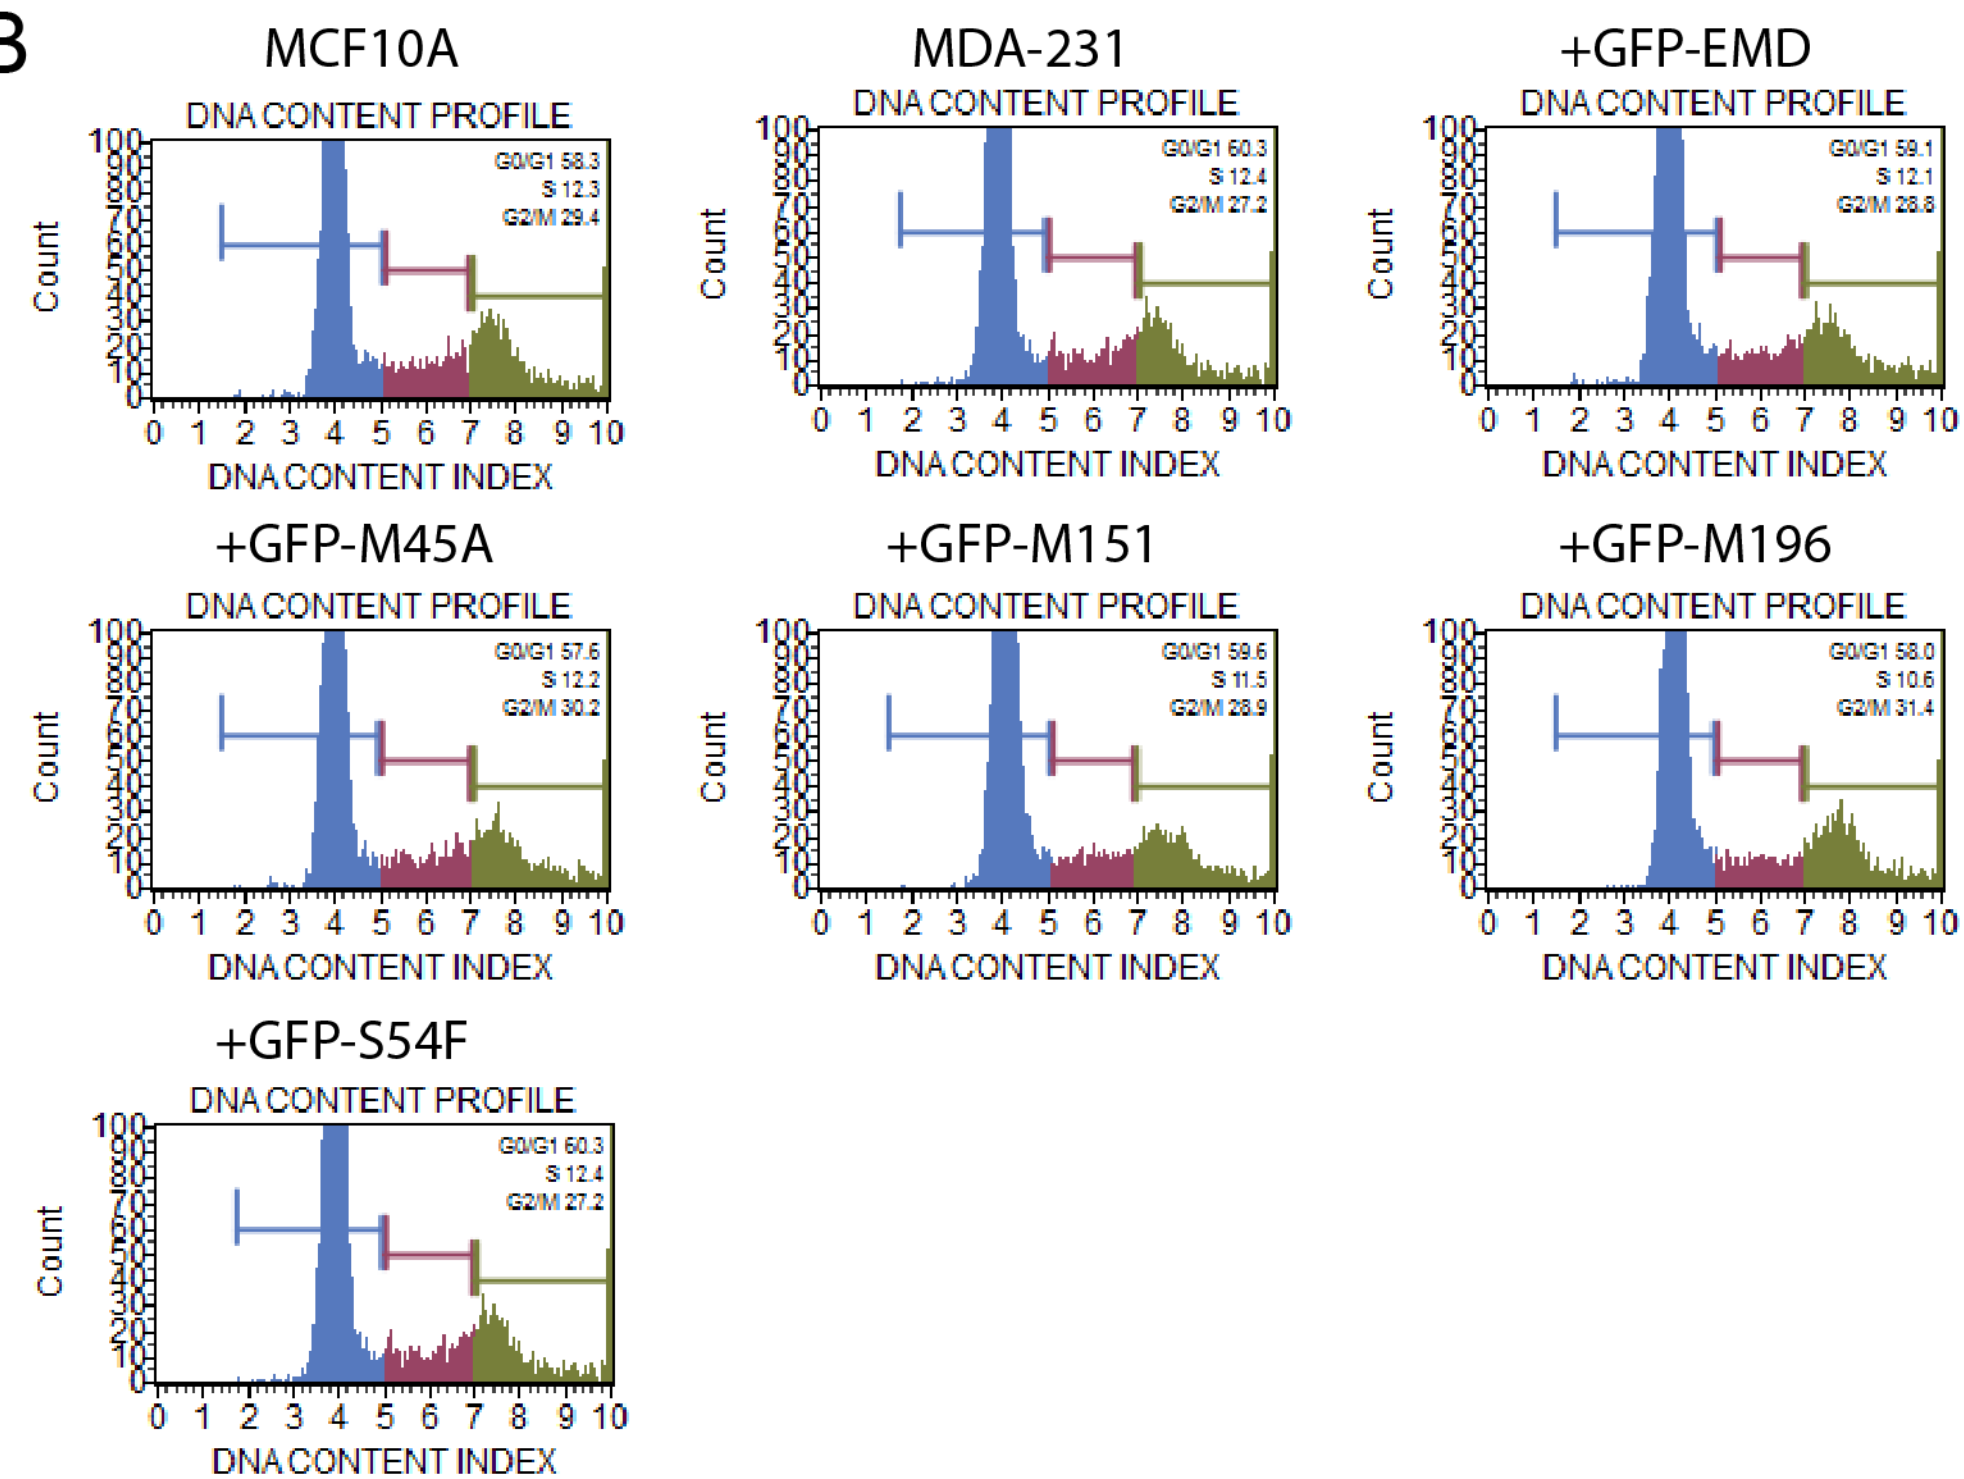

## C

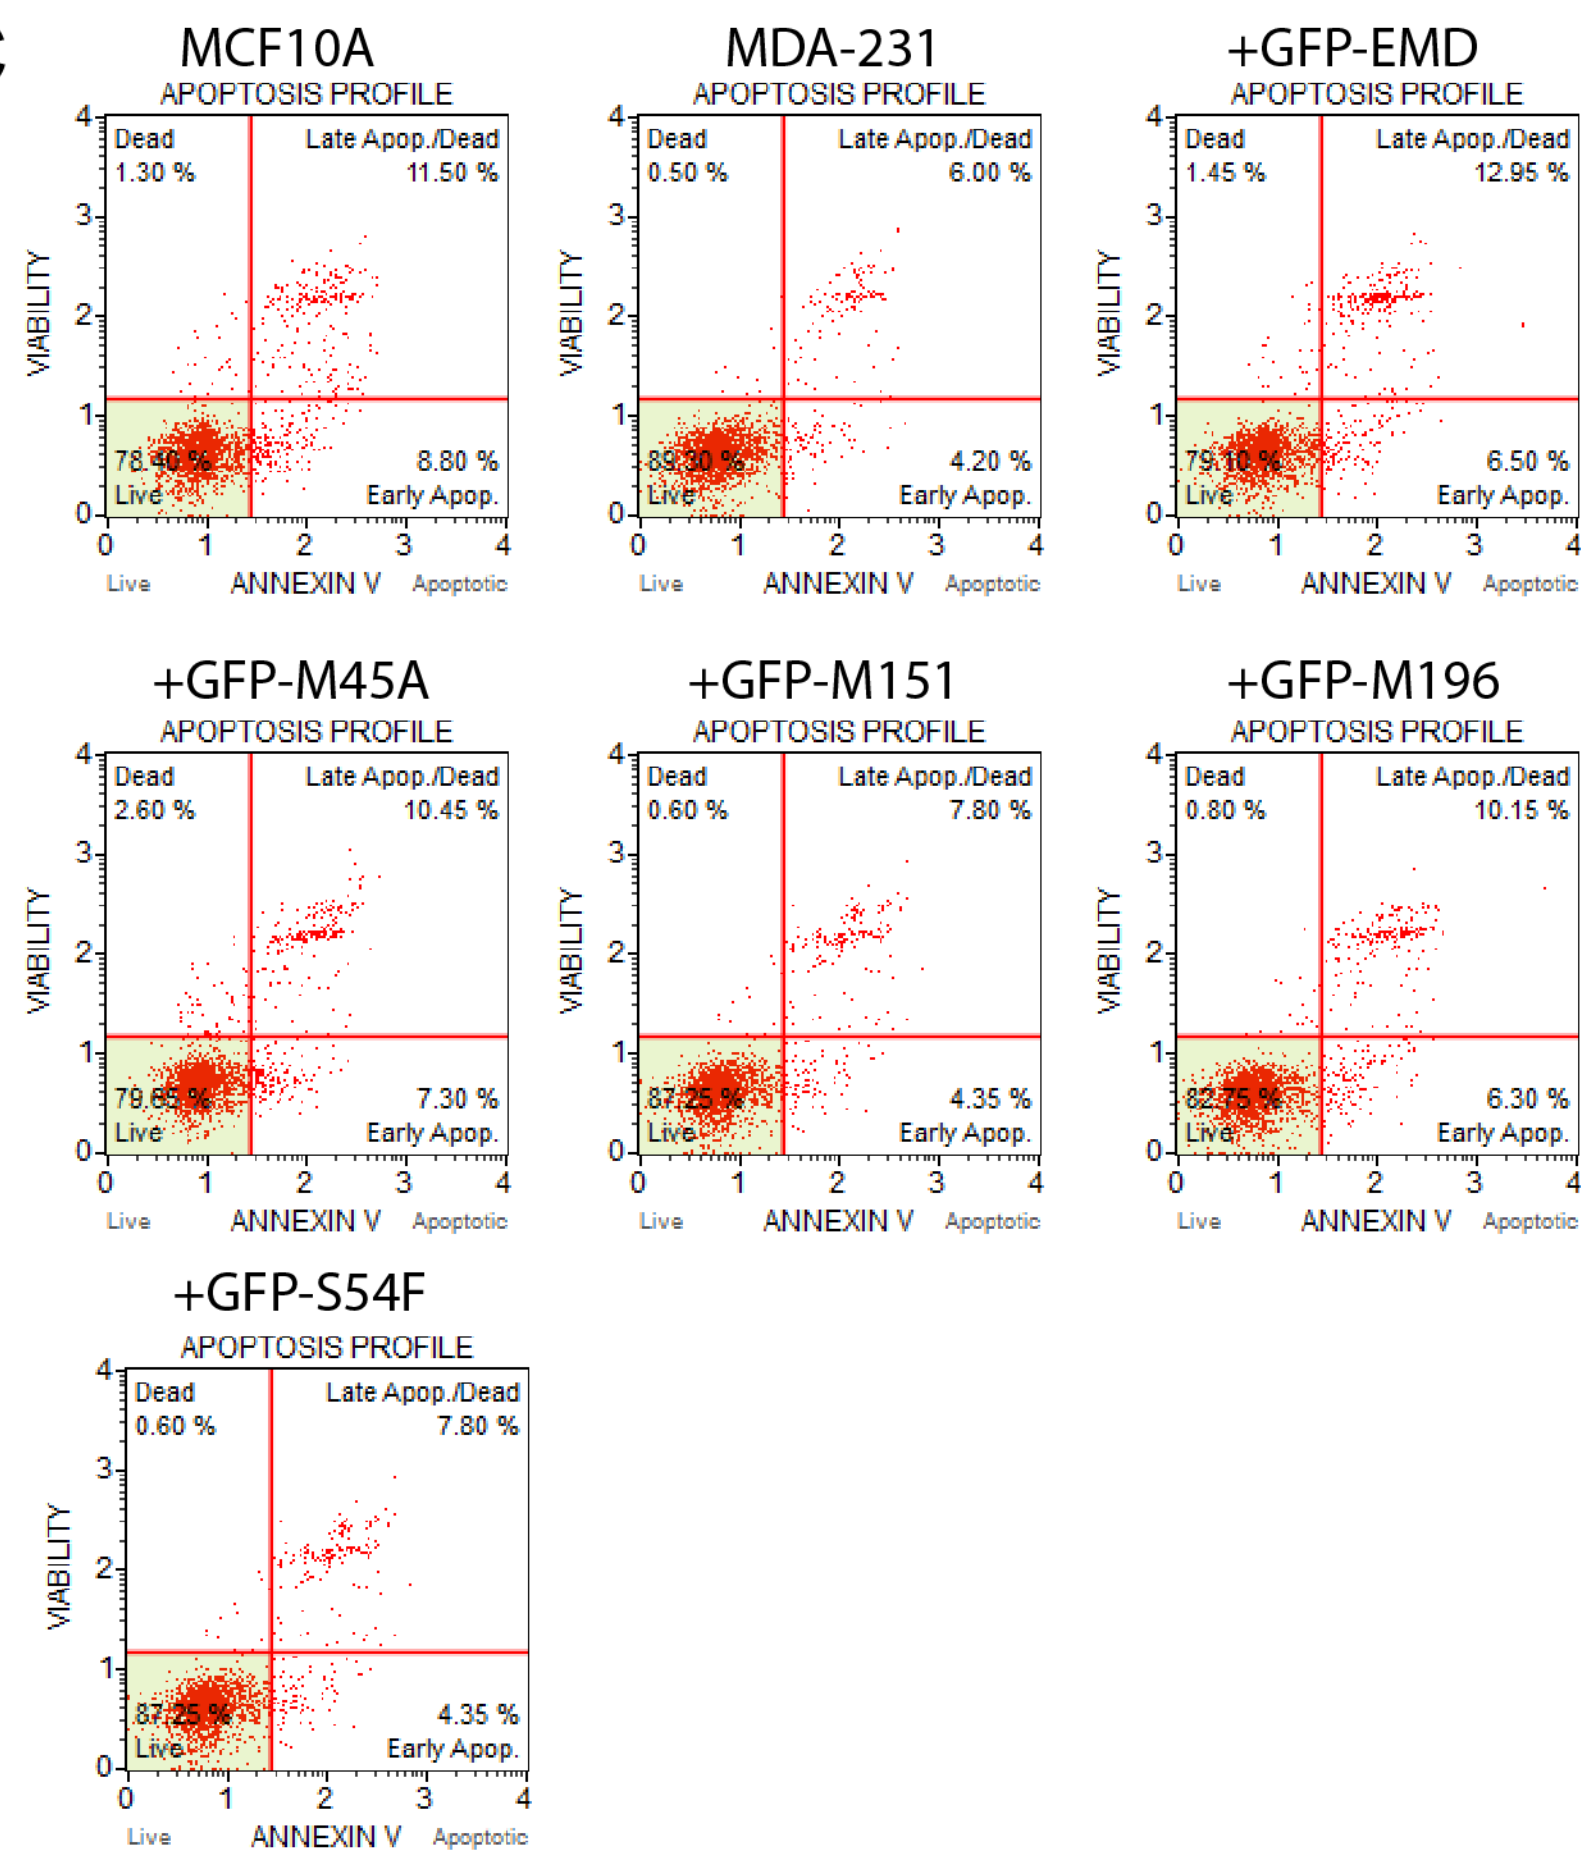

## D

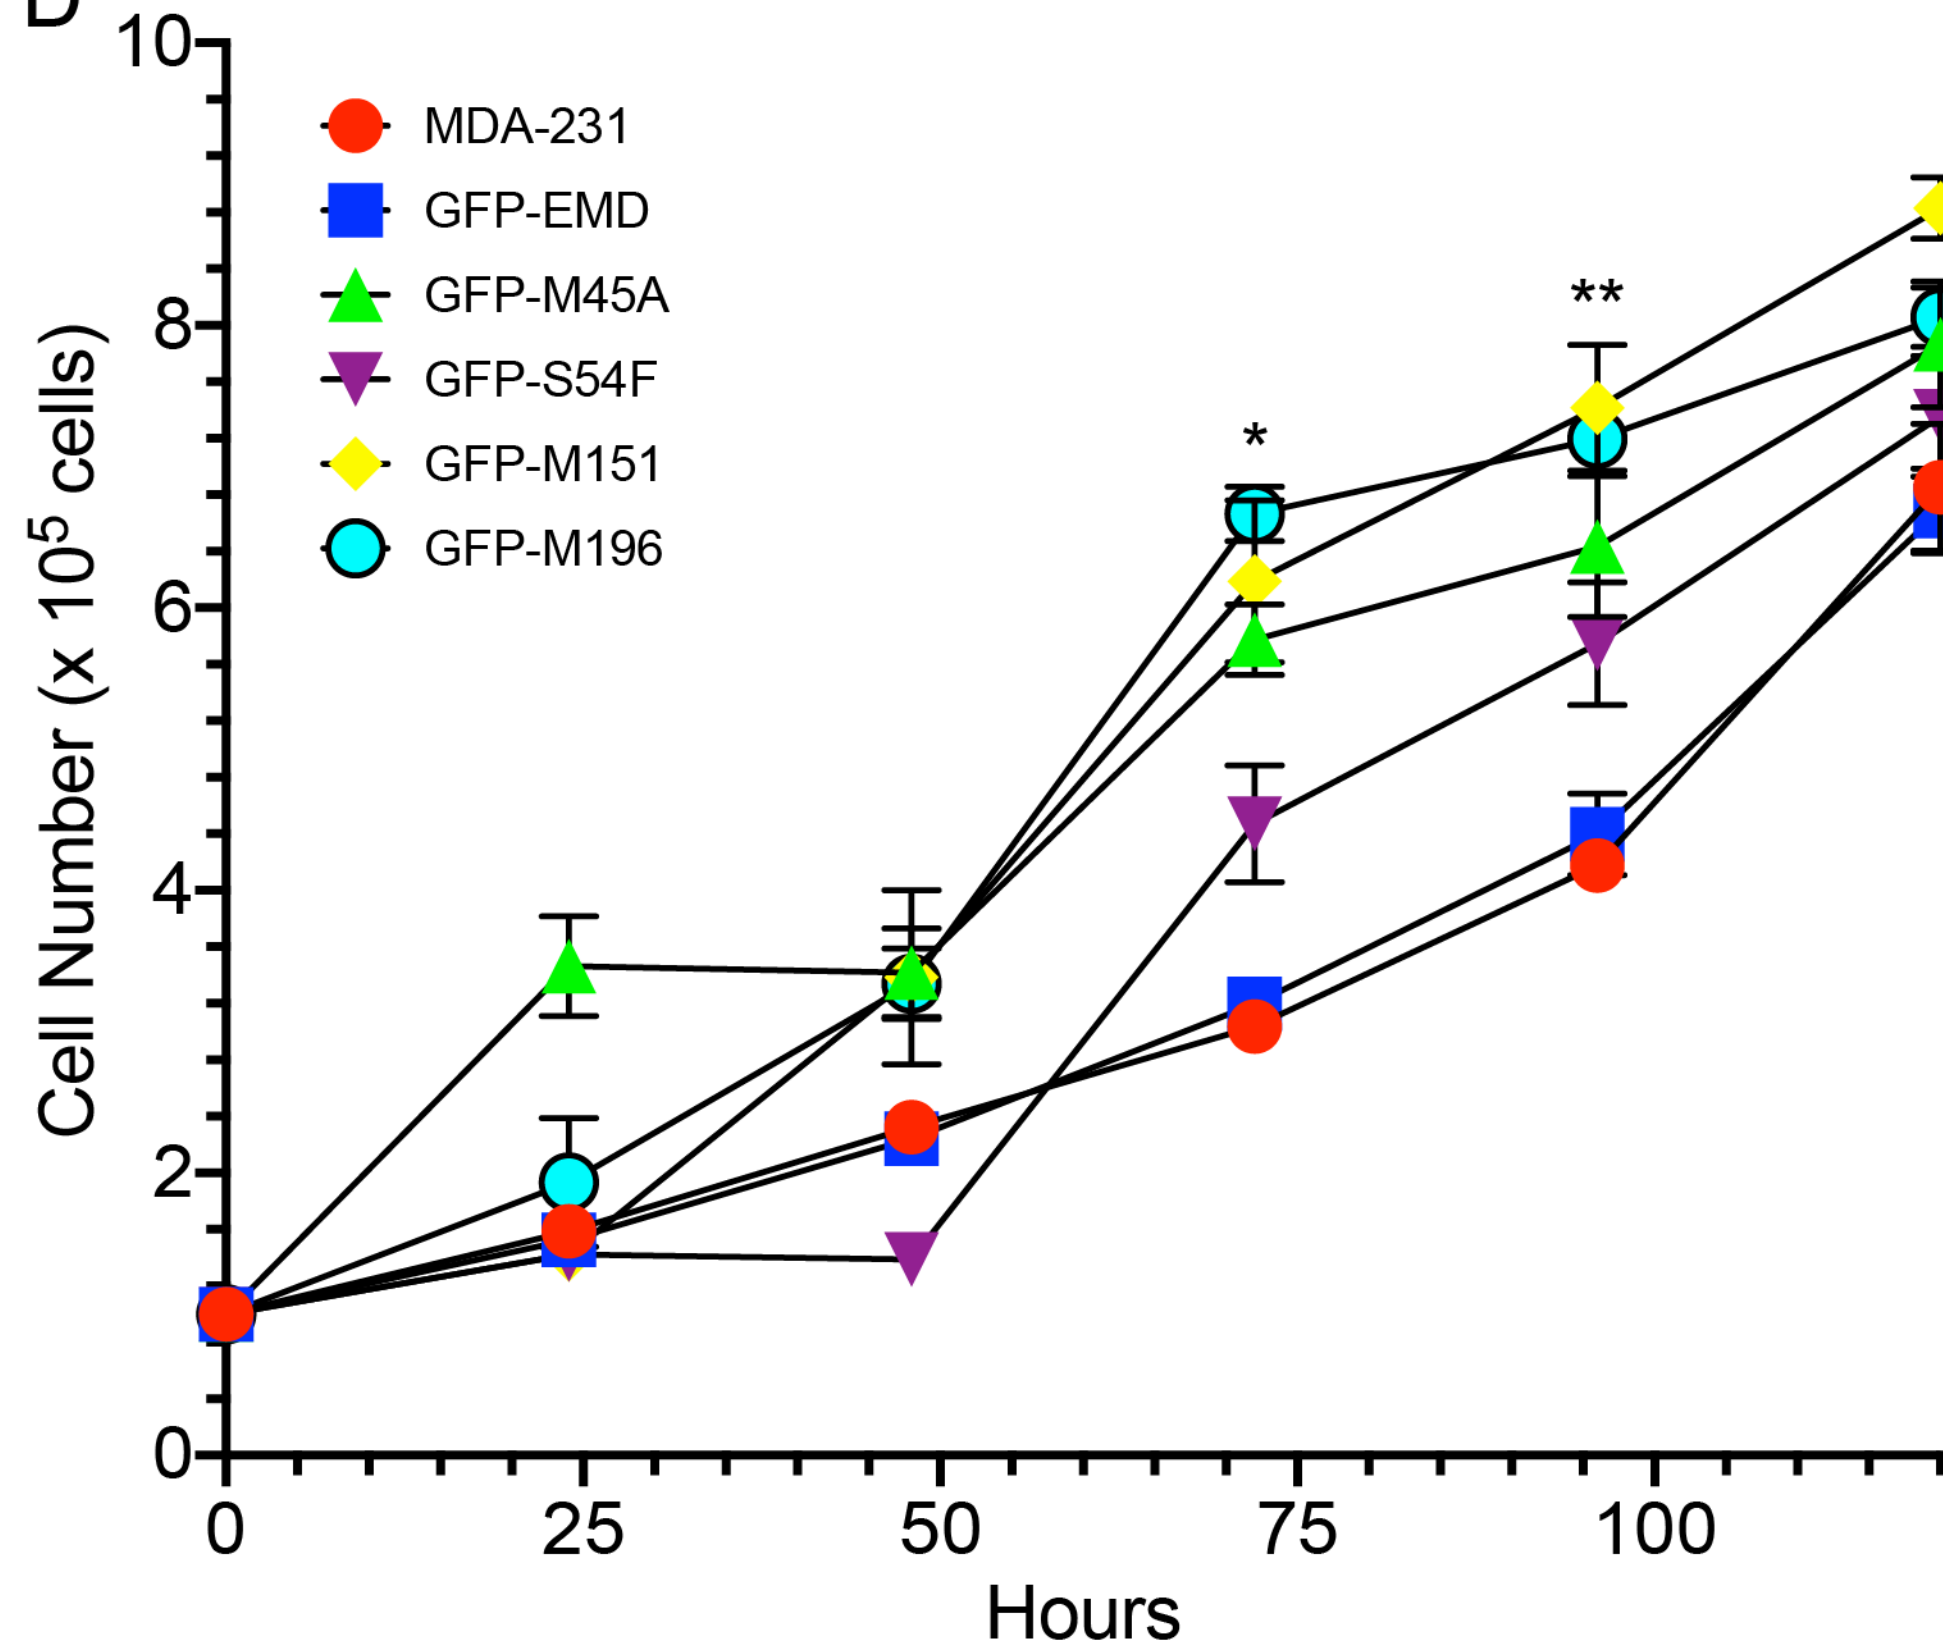

# Supplemental Figure 4

## A 8.0 $\mu\text{m}$ pore Transwells

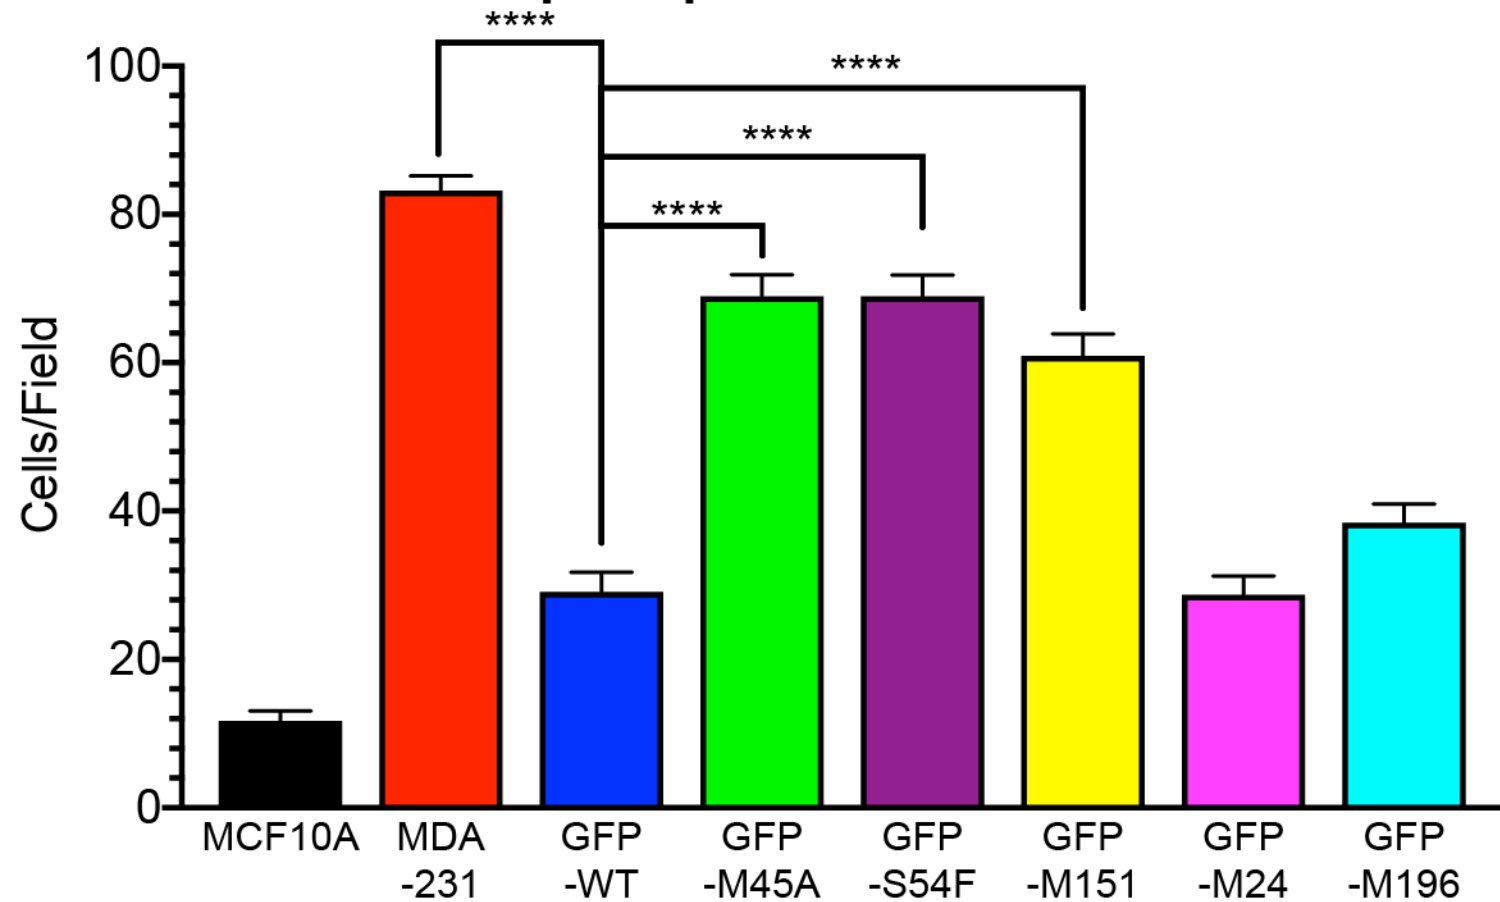

# Supplemental Figure 5

**A**

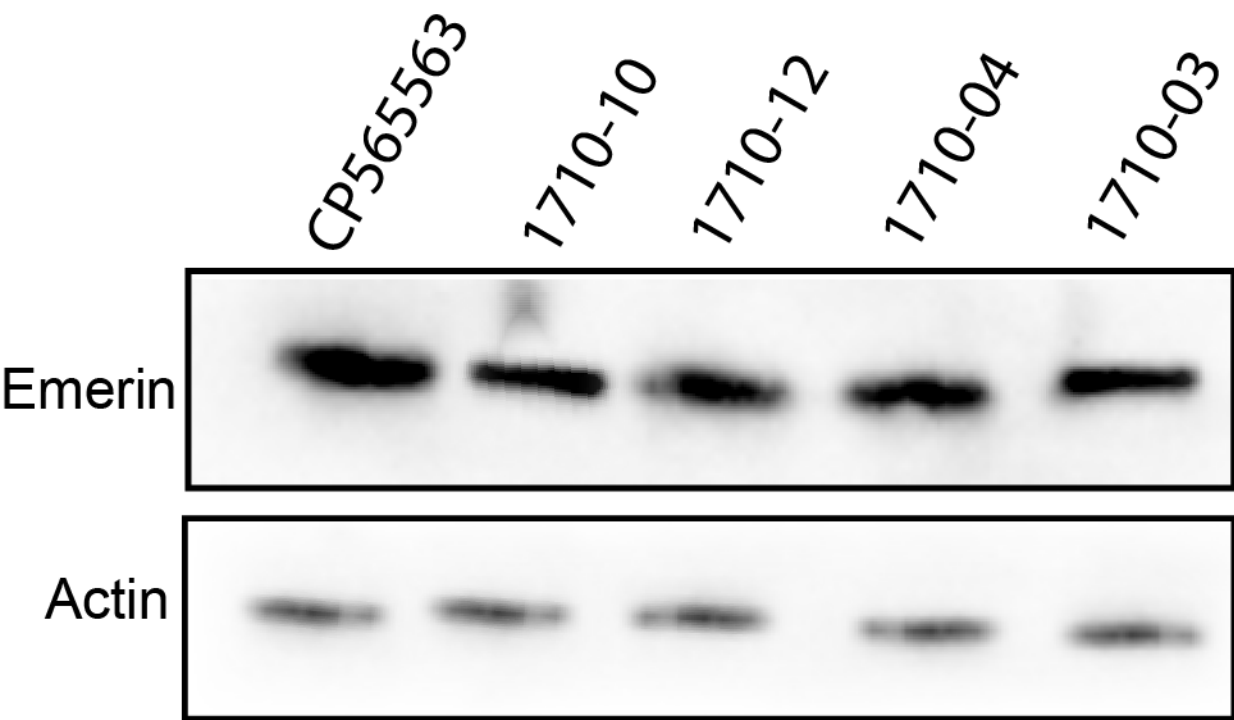

**B**

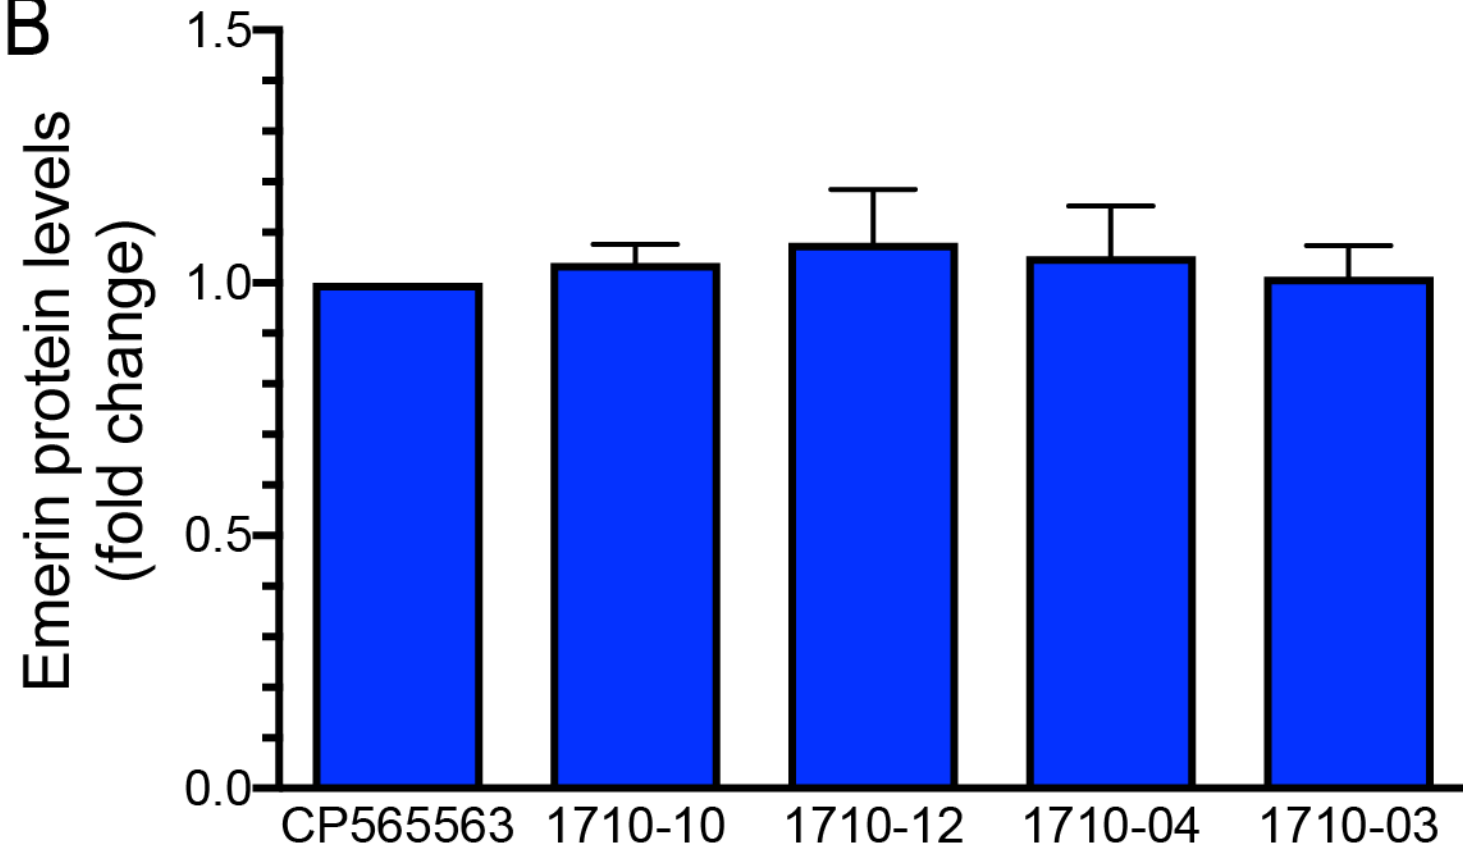

## Supplemental Figure Legends

Supplemental Figure 1: **Emerin-null myogenic progenitor nuclei are smaller than wild-type myogenic progenitor nuclei.** (A) Additional representative DAPI (blue) images of MCF10A, MDA-231, and MDA-157 cells. Scale bars: 100  $\mu$ m. (B) Nuclear area of wild-type H2K myogenic progenitor cells (blue, n=353) and emerin-null (EMD-null) H2K myogenic progenitor cells (red, n=493). Error bars represent standard error. \*\*\*\*p-value < 0.0001, unpaired t-test. (C) Representative DAPI (blue) images of wild-type H2K cells and emerin-null H2K cells. Scale bars: 100  $\mu$ m. Thus, reduction of nuclear size in the absence of emerin is not characteristic of only invasive breast cancer cells, but emerin regulation of nuclear size and structure is likely a function shared in most cell types.

Supplemental Figure 2: **GFP-emerin increases nuclear area in MDA-157 cells.** (A) Nuclear area of MDA-157 cells (n=147, black), MDA-157 cells with no plasmid, but electroporated (electroporation control; n=67, red), and MDA-157 cells expressing GFP (n=48, orange) or GFP-emerin (n=64, blue). Error bars represent standard error. \*p-value = 0.0111, unpaired t-test (B) Representative DAPI (blue) and GFP-emerin (green) images of MDA-157 cells. Scale bar: 50  $\mu$ m. (C) Cytoplasmic area of MCF10A cells, MDA-231 cells, or MDA-231 cells expressing GFP-emerin, GFP-M45A, GFP-M151, GFP-M196, or GFP-S54F. Error bars represent standard deviation. \*\*p-value = 0.0097, \*\*\*p-value = 0.0003, one-way ANOVA.

Supplemental Figure 3: **GFP-emerin and GFP-emerin mutants do not affect cell cycle progression or apoptosis.** (A) Percentage of total cell number within each phase of the cell cycle for MCF10A cells (n=4), MDA-231 cells (n=4), or MDA-231 cells expressing GFP-emerin (n=4), GFP-M45A (n=4), GFP-M151 (n=4), GFP-M196 (n=4) or GFP-S54F (n=4) is shown. (B) Histograms from a representative experiment for MCF10A cells, MDA-231 cells, or MDA-231 cells expressing GFP-emerin, GFP-M45A, GFP-M151, GFP-M196, or GFP-S54F. There is no

significant difference in cell cycle dynamics between any of the cell lines. (C) Representative Annexin V histograms of MCF10A cells, MDA-231 cells, or MDA-231 cells expressing GFP-emerin, GFP-M45A, GFP-M151, GFP-M196, or GFP-S54F are shown. There is no significant difference in the number of apoptotic or dead cells between any of the cell lines. (D) Growth curve of MDA-231 cells or MDA-231 cells expressing GFP-emerin, GFP-M45A, GFP-M151, GFP-M196, or GFP-S54F.  $1 \times 10^5$  cells were plated and the number of cells were counted at 24, 48, 72, 96, and 120 hours. Error bars represent standard error. \*t=72, GFP-M45A, p-value = 0.0273; GFP-M151, p-value = 0.0191; GFP-M196, p-value = 0.0152. \*\*t=96, GFP-M45A, p-value = 0.044; GFP-M151, p-value = 0.0231; GFP-M196, p-value = 0.0172, one-way ANOVA. Although there are some growth rate differences seen between some of the cell lines, these differences fail to correlate with increased tumor growth or metastasis in mice; e.g., MDA-231 and GFP-emerin cells grow at the same rate, but exhibit major differences in tumor growth and metastasis.

Supplemental Figure 4: **GFP-emerin expression decreases cell migration through 8.0  $\mu\text{m}$  pores.** (A) The number of cells migrating through 8.0  $\mu\text{m}$  transwell pores is shown for MCF10A cells, MDA-231 cells, and MDA-231 cells expressing GFP, GFP-emerin, GFP-M45A GFP-S54F, GFP-M151, GFP-M24, or GFP-M196. Error bars represent standard deviation. \*\*\*\*p-value < 0.0001 by one-way ANOVA.

Supplemental Figure 5: **Normal control patient samples from multiple sources have similar emerin protein levels.** (A) Western blot analysis of protein lysates from patients without breast cancer. (B) Quantitation of protein lysates. Bands were normalized to actin and the control patient sample used for Figure 6 quantification (CP565563, n=3). Error bars represent standard deviation.
